# Supplementary material for: Immunomodulatory Peptides as Vaccine Adjuvants and Antimicrobial Agents
Source: MDPI journal article supplement (doi:10.3390/ph17020201), 2024-02-02
Supplement: s1 [file s1]

**Supplementary Material S1** Immunomodulatory (IM) peptides applicable as immunoadjuvants with a length of 10 and 15 amino acid residues encrypted in various arthropod AMPs. IM peptides with a score  $\geq 0.7$  were retrieved using the VaxinPAD program.

| SPECIE                           | Name of parent peptide | Antimicrobial peptide                                                                                       | Peptide ID   | Proposed IM sequence from Vaxinpad |
|----------------------------------|------------------------|-------------------------------------------------------------------------------------------------------------|--------------|------------------------------------|
| <i>Hyas araneus</i>              | Arasin 2               | SRWPSPGRPRPFGRPNPIFRPRPCICVRQPCCDTY                                                                         | HAara2-163   | PCICVRQPCP                         |
| <i>Portunus trituberculatus</i>  | PtesALF1               | YEALVTSILGKLTGLWHNDSVDFMGHICYFRRRPKIRRFKLYHEGKFWCPGWAPFEGRCKYCVVF                                           | PTesalf1-457 | ICYFRRRPKIRRFKL                    |
| <i>Macrobrachium rosenbergii</i> | MrH4                   | MTGRGKGGKGLGKGGAKRHRKVLRDNIQGITKPAIRRLARRGGVKRISGLIYEETRGLKVFLENVIRDAVITYTEHAKR<br>KTVTAMDVVYALKRQGRPLYGFGG | MRh4-679     | KPAIRRLARR                         |
| <i>Scylla paramamosain</i>       | Arasin-likeSp          | SPRVSRRYGRPFGRPFVGGQFGRPGVCIRSPCPCANYG                                                                      | SPAara-291   | CVCIRSPCPC                         |
| <i>Scylla paramamosain</i>       | Sp-ALF1                | YETLIASVLGKLTGLWHNNSVDFMGHTCHFRRRPKVRKFYHEGKFWCPGWAPFEGRSRTKSRSRSGSSREAIKDFVRKA<br>LQNGELITQQDATVWVN        | SPalf1-452   | RRRPKV<br>RKFK                     |
| <i>Calliphora vicina</i>         | Alloferon              | HGVSGHGHGVHG                                                                                                | CVa11-91     | SGHGHGVHG                          |
| <i>Limulus</i>                   | LALF                   | DGIWTQLIFTLVKNLATLWQSGDFQLDHECHYRIKPTFRRLKWKYKGFWCPSWTSITGRATKSSRSGAVEHSVRNFV<br>GQAKSSGLITQRQAEQFISQYN     | LPalf1-      | YRIKPTFRRLKWK                      |

|                               |                           |                                                |               |                 |
|-------------------------------|---------------------------|------------------------------------------------|---------------|-----------------|
| <i>polyphemus</i>             |                           |                                                | 455           | YK              |
| <i>Pachycondyla goeldii</i>   | Ponericin W3              | GIWGTLAKIGIKAVPRVISMLKKKKQ                     | PGponW3-227   | VPRVISMLKK      |
| <i>Pteromalus puparum</i>     | PP113                     | GKWGWIIYITILFADVGGFKSSRHPEERRVQERRFKRITRGPD    | PPp113-266    | RVQERRFKRI      |
| <i>Ixodes ricinus</i>         | DefMT5                    | GFFCPYNGYCDRCRKKLRRRGGYCGGRWKLTCICIMN          | IRdefmt5-704  | RCRKKLRRRG      |
| <i>Lachesana tarabae</i> vi   | Latarcin-1                | SMWSGMWRRKLKKLRNALKKKLGKE                      | LTlat1-381    | GMWRRKLKKL      |
| <i>Mesobuthus marten</i> sii  | BmKbpp                    | FRFGSFLKKVWWSKLAKKLRSKGKQLLDYANKVLNGPEEEAAAPAE | MMbmK-503     | SFLKKVWWSKLAKKL |
| <i>Gastrophysa atrocyanea</i> | Diapause-specific peptide | AVRIGPCDQVCPRIVPERHECCRAHGRSGYAYCSGGGMYCN      | GAdia-145     | VRIGPCDQVCPRIVP |
| <i>Lachesana tarabae</i> vi   | Latarcin-5                | GFFGKMKEYFKKFGASFKRRFANLKKRL                   | LTlat5-387    | FKRRFANLKK      |
| <i>Oiketicus kirbyi</i>       | Cecropin                  | WKPFKKIEKAVRRVRDGVAKAGPAVAVVGQAT               | OKcec-603     | WKPFKKIEKAVRRVR |
| <i>Lucilia sericata</i>       | LSerStomox1               | AGFRKRFNKLVKVKHTIKETANVSKDVAIVAGSGVAVGAAMG     | LSerstox1-548 | RKRFNKLVKVKHTI  |
| <i>Galleria</i> a             | AGm1                      | ENFFKEKERKGQRIRDAIISRRPRVETLAQAQKIIKGGD        | GMagm         | RIRDAIIS        |

|                                        |                |                                                                                                    |  |             |                         |
|----------------------------------------|----------------|----------------------------------------------------------------------------------------------------|--|-------------|-------------------------|
| <i>mellonella</i>                      |                |                                                                                                    |  | 1-684       | RR                      |
| <i>Callinectes sapidus</i>             | Callinectin    | WNSNRRFRVGRPPVVGRPGVCFRAPCPCSNY                                                                    |  | CScal-89    | CVCFRA<br>PCPC          |
| <i>Rhipicephalus haema physaloides</i> | Rhamp          | ERILDLRKTCKKCKNGEVLGCVSGHGPPGCSENECGMGRPKACFFDCHYGCWCTGKLYRRKRDRKCVPKHECLL                         |  | RHrha-419   | RRKRDR<br>KCVP          |
| <i>Parabuthus schlechteri</i>          | Parabutopon    | FKLGSFLKKAWSKLAKKLRAKGKEMLDYAKGLLEGGSEEVPGQ                                                        |  | PSpa-351    | SFLKKA<br>WKSCLA<br>KKL |
| <i>Scylla paramamosain</i>             | Sp-ALF2        | YEALVASILGKLSGLWHS DTVDFMGHTCHIRRRPKFRKFKLYHEGKFWCPGWTHLEGNSRTKSRS GSARDAIKDFVYKALQNKLITENNA AAWLK |  | SPalf2-453  | HIRRRPK<br>FRK          |
| <i>Scylla paramamosain</i>             | Sp-ALF3        | YEALVASILGKLSGLWHS DTVDFMGHTCHIRRRPKFRKFKLYHEGKFWCPGWTHLEGNSRTKSRS GSARDAIKDFVYKALQNKLITENNA AAWLK |  | SPalf2-453- | TCHIRRR<br>PKFRKF<br>KL |
| <i>Ixodes scapularis</i>               | Scapularisin-3 | AFGCPFDQGTCHSHCRSIRRRGRRCASF AKRTCTCYQK                                                            |  | ISsca3-531  | IRRRGRR<br>CASFAK<br>RT |
| <i>Macropis fulvipes</i>               | Macropin 1     | GFGMALKLLKKVL                                                                                      |  | MFmac1-176  | GMALKL<br>LKKV          |
| <i>Vaejovis punctatus</i>              | VpAmp1.0       | LPFFLLSLIPSAISAIKKI                                                                                |  | VPamp1-709  | IPSAISAI<br>KK          |
| <i>Drosophila melanogaster</i>         | Cecropin-C     | GWLKKLGKRIERIGQHTRDATIQGLGIAQQAANVAATARG                                                           |  | DMcccC-120  | LKKLGK<br>RIERIGQ<br>HT |
| <i>Androctonus</i>                     | Androctoni     | RSVCRQIKICRRRGGCYYKCTNRPY                                                                          |  | AAaand-     | RQIKICR                 |

|                                 |                          |                                                                                                                                |  |             |                 |
|---------------------------------|--------------------------|--------------------------------------------------------------------------------------------------------------------------------|--|-------------|-----------------|
| <i>australis</i>                | n                        |                                                                                                                                |  | 324         | RRG             |
| <i>Cryptotympana dubia</i>      | Cryptonin                | GLNGLALRLGKRALKKIIKRLCR                                                                                                        |  | CDcry106    | RALKKIIKRL      |
| <i>Bombyx mori</i>              | Moricin 2                | AKIPIKAIKTVGKAVGKGLRAINIASTANDVFNLKPKKRKH                                                                                      |  | BMmor2-64   | NFLKPKKRKH      |
| <i>Scylla serrata</i>           | SsALF                    | QYEALVASILGKLSGLWHSDTVDFMGHTCHIRRKPKFRKFKLYHEGKFWCPGWITHLEGNSRTKSRSGSTREATKDFVHK<br>ALQNKLITKNSADAWLKG                         |  | Ssal f-495  | TCHIRRKPKFRKFKL |
| <i>Litopenaeus vannamei</i>     | Histone H2A              | SGRGKGGKVKGKSKSRSSRAGLQFPVGRIHRLLRKGNYAERVGAGAPVYLAAVMEYLAAEVLELAGNAARDNKKTRIV<br>PRHLQLAIRNDEELNKLLSGVTIAQGGVLPNIQAVLLPKKTEKK |  | LVhis-638   | KKTRIVPRHLQLAIR |
| <i>Derma-centor silvarum</i>    | Ds-defensin              | VPAESEAAHLRVRRGFGCPLNQGACHNHCSIRRRGGYCSGIIKQTCTCYRN                                                                            |  | DSdef-706   | LRVRRGFGCP      |
| <i>Portunus trituberculatus</i> | PtALF7                   | QYEALTAAILTKLSKMWHSDDLNFLGHTCHVSRTPTVKRFKLYWKGKFWCPGWAPFSGTSRTKSRSGSAREATKSFVDQ<br>ALQRRLLITQQEADLWLKG                         |  | PTalf7-456  | VKRFKLYWKG      |
| <i>Scolopendra mutilans</i>     | Scolopin-1               | FLPKMSTKL RVPYRRGTKDYH                                                                                                         |  | SMscol-594  | TKLRVPYRRG      |
| <i>Periplaneta americana</i>    | ISGCock Contig13_4 610?1 | YPCKLNLKLGKVPFHF                                                                                                               |  | PAisg13-726 | YPCKLNLKLGKVPFH |
| <i>Galleria mellonella</i>      | Gm1                      | ENFFKEIERAGQRIRDAIISAAPAVETLAQAQKIIKGGD                                                                                        |  | GMgm1-136   | QRIRDAIISA      |
| <i>Acalolepta</i>               | Luxoriosin               | SVRTQDNAVNRQIFGSNGPYRDFQLSDCYLPLETNPYCNEWQFAYHWNALMDCERAIYHGCNRTRNNFITLTACKNQ                                                  |  | ALI         | RAIYHG          |

|                                                     |                                           |                                                                                                 |                         |                         |
|-----------------------------------------------------|-------------------------------------------|-------------------------------------------------------------------------------------------------|-------------------------|-------------------------|
| <i>luxurio<br/>sa</i>                               |                                           | AGPICNRRRH                                                                                      | ux-2                    | CNRT                    |
| <i>Bomby<br/>x mori</i>                             | Moricin                                   | AKIPIKAIKTVGKAVGKGLRAINIASTANDVFNFLKPKKRKA                                                      | BM<br>mor-<br>72        | FNFLKPK<br>KRK          |
| <i>Vespa<br/>tropica</i>                            | Mastoparan<br>-VT3                        | INLKAITALAKLL                                                                                   | VT<br>mas<br>3-<br>505  | LKAITAL<br>AKK          |
| <i>Bomby<br/>x mori</i>                             | CECD_BO<br>MMO<br>Cecropin-D<br>precursor | GNFFKDLEKMGQVRDAVISAAPAVDTLAKAKALGQ                                                             | BM<br>cec-<br>70        | QVRDA<br>VISA           |
| <i>Acanth<br/>oscurri<br/>a<br/>gomesi<br/>ana</i>  | Gomesin                                   | QCRRLCYKQRCVTYCRGR                                                                              | AGg<br>om-<br>328       | RRLCYK<br>QRCV          |
| <i>Mischo<br/>cyttaru<br/>s<br/>phthisi<br/>cus</i> | Mp_mastop<br>aran MP                      | INWLKLGKKMMSAL                                                                                  | MP<br>mas-<br>180       | LKLGKK<br>MMSA          |
| <i>Rhipice<br/>phalus<br/>micropl<br/>us</i>        | Microplusi<br>n                           | HHQELCTKGDDALVTELECIRLRISPETNAAFDNAVQQLNCLNRACAYRKMCAATNNLEQAMSVYFTNEQIKEIHDAATA<br>CDPEAHHEHDH | RM<br>mic-<br>375       | ECIRLRIS<br>PE          |
| <i>Mesob<br/>uthus<br/>eupeus</i>                   | Meucin-25                                 | VKLIQIRIQYVTVLQMFSMKTQ                                                                          | ME<br>meu<br>25-<br>416 | VKLIQIRI<br>WI          |
| <i>Drosop<br/>hila<br/>melano<br/>gaster</i>        | Drosomyei<br>n-2                          | DCLSGKYKGPCAVWDNEMCRRICKEEGHISGHCSPLKWCCEGC                                                     | DM<br>dro2<br>-110      | PCAVWD<br>NEMCRR<br>ICK |
| <i>Oxyope<br/>s</i>                                 | Oxyopinin-<br>2                           | GKFSVFGKILRSIAKVFKGVGKVRKQFKTASDLDKNQ                                                           | OKo<br>xy2-             | AKVFKG<br>VGKVRK        |

|                                         |                        |                                                                         |  |               |                   |
|-----------------------------------------|------------------------|-------------------------------------------------------------------------|--|---------------|-------------------|
| <i>kitabensis</i>                       |                        |                                                                         |  | 371           | QFK               |
| <i>Pacificastacus leniusculus</i>       | Astacidin 1            | FKVQNQHGGVVKIFHH                                                        |  | Plast-417     | FKVQNHGQVVKIFH    |
| <i>Oxyopes takobius</i>                 | Oxt 4a                 | GIRCPKSWKCKAFKQRVLKRLLAMLRQHAF                                          |  | OTOxt4a-429   | RVLKRL LAML       |
| <i>Lachesana tarabaeivi</i>             | Latarcin-2a            | GLFGKLIKKGFRKAISYAVKKARGKH                                              |  | LTlat2a-382   | IKKFGRK AISYAV KK |
| <i>Scolopendra subspinipes mutilans</i> | Scolopendin 1          | MDSFQKIEKIGEGTYGVVYKADKVSGRVLVKKIRLENESEGVSTA                           |  | SSMsc o1-529  | RLVALK KIRL       |
| <i>Macrospis fulvipes</i>               | Macropin 2             | GTGLPMSERRKIMLMMR                                                       |  | MFmac 2-177   | ERRKIM LMMR       |
| <i>Ceratitiscapitata</i>                | Ceratotoxin C          | SLGGVISGAKKVAKVAIPIGKAVLPVVAKLVG                                        |  | CCcerC-94     | VISGAK KVAKVA IPI |
| <i>Podisus maculiventris</i>            | Thanatin               | GSKKPVPPIYCNRRTGKCQRM                                                   |  | PMtha-315     | KKPVPPI YCNRRTGK  |
| <i>Lachesana tarabaeivi</i>             | Cytoinsecto toxin 1-13 | GFFGNTWKKIKGKADKIMLKKAVKIMVKKEGISKEEAQAKVDAMSKKQIRLYLLKHYGKKLFFKRPKNCDQ |  | LTCyt1-13-628 | LKHYGK KLFK       |
| <i>Bactro</i>                           | Bactrocerin            | VGKTWIKVIRGIGKSIKWQ                                                     |  | BDb           | IKVIRGI           |

|                               |                               |                                                                                                                                                                                                       |  |              |                  |
|-------------------------------|-------------------------------|-------------------------------------------------------------------------------------------------------------------------------------------------------------------------------------------------------|--|--------------|------------------|
| <i>cera dorsalis</i>          | -1                            |                                                                                                                                                                                                       |  | ac1-56       | GKS              |
| <i>Bactrocera dorsalis</i>    | Bactrocerin-1                 | VGKTWIKVIRGIGKSKIKWQ                                                                                                                                                                                  |  | BDb ac1-56-  | WIKVIRGIGKSKIKW  |
| <i>Vespa magnifica</i>        | Vespid chemotactic peptide 5g | FLIIRRPVLGLL                                                                                                                                                                                          |  | VM ves-579   | FLIIRRPVL        |
| <i>Simulium bannanense</i>    | SibaCec                       | GKLTGDKLKRGAKKALNVASKVAPIVAAGASIAR                                                                                                                                                                    |  | SBsi b-711   | KLKRGAKKAL       |
| <i>Ixodes sinensis</i>        | Ixosin-B                      | QLKVLDLWGTRSGIQPEQHSSGKSDVRRWRSRY                                                                                                                                                                     |  | ISix oB-169  | KSDVRRWRSR       |
| <i>Hyalophora cecropia</i>    | Cecropin-A                    | KWKLFKKIEKVGQNIRDGIIKAGPAVAVVGQATQIAK                                                                                                                                                                 |  | HCC ecA-322  | WKLFFKIEKVGQNIR  |
| <i>Haploelma hainanum</i>     | Oh-defensin                   | MLCKLSMFGAVLGVPACAI DCLPMGKTGGSCGGVCGCRKLT F KILWDKKFG                                                                                                                                                |  | 5HH oh-d-431 | GCRKLT F KIL     |
| <i>Periplaneta americana</i>  | ISGCock_Contig12_4 176        | VGRKHSILNCIPYLKKKKIMRL                                                                                                                                                                                |  | PAis g12-732 | LNCIPYLKKKKIMRL  |
| <i>Bombyx mori</i>            | Attacin                       | QAGSFTVNSDGTSGAALKVPLTGNDKNVLSAIGSADFNDRHKL SAASAGLALDNVNGHGLSLTGTRIPGFGEQLGVAGK VNLFHNNNHDL SAKAF AIRNSPSAIPNAPNFNTLGGGV DYMFKQKVGASLSAAHSDVINRNDYSAGGKLN LFRSPSSSLD FNAGFKKFDT P FYRSSWEPNVGFSFSKFF |  | BM att-73    | SAKAF AIRNSPSAIP |
| <i>Litopenaeus stylirosus</i> | Ls-Stylicin1                  | SSFSPPRGPPGWGPPCVQQPCPKCPYDDYKCPTCDKFPECEECPHISIGCECGYFSCCEPKPVCEPCESPIAELIKGGYKG                                                                                                                     |  | LSst yl-174  | PCVQQP CPKC      |

|                                |                                                   |                                                                       |                     |                         |
|--------------------------------|---------------------------------------------------|-----------------------------------------------------------------------|---------------------|-------------------------|
| <i>Hogna carolinensis</i>      | Lycotoxin-2                                       | KIKWFKTMKSIAKFIAKEQMKKHLGGE                                           | HCl<br>yc2-363      | KIKWFK<br>TMKS          |
| <i>Galleria mellonella</i>     | G.<br>mellonella<br>moricin-<br>like peptide<br>A | KVNANAIKGGKAIGKGFKVISAASTAHDVYEHKNNRH                                 | GM<br>g.me<br>A-137 | AIGKGF<br>KVIS          |
| <i>Cicada flammata</i>         | Cicadin                                           | NEYHGFVDKANNENKRKKQQGRDDFVVKPNNFANRRRKDDYNENYYDDVDAADV                | CFci<br>c-619       | NFANRR<br>RKDD          |
| <i>Antheraea pernyi</i>        | pro-ApCec                                         | APEPKWKFFKKIERVGGQNIRDGIIKAGPAVAVVGQATNIAKG                           | APp<br>ro-763       | WKFFKK<br>IERVGQ<br>NIR |
| <i>Drosophila melanogaster</i> | CEC3_DR<br>OVI<br>Cecropin-3<br>precursor         | GWLKKIGKKIERIGQHTRDATIQGVGIAQQAANVAATAR                               | DM<br>cec3-121      | LKKIGK<br>KIERIGQ<br>HT |
| <i>Heliothis virescens</i>     | Cecropin-B                                        | KWKVFKKIEKVGRNIRDGIVKAGPAIAVLGQAN                                     | HVc<br>ecB-155      | KWKVFK<br>KIEK          |
| <i>Lachesana tarabae</i>       | Cytoinsecto<br>toxin-1a                           | GFFGNTWKKIKGKADKIMLKKAVKIMVKKEGISKEEAQAKVDAMSKKQIRLYLLKYYGKKALQKASEKL | LTc<br>yt1a-467     | MLKKAV<br>KIMV          |
| <i>Locusta migratoria</i>      | Locustin                                          | ATTGCSCPQCII FDPICASSYKNGRRGFSSGCHMRCYNRCHGTDYFQISKGSKCI              | LMI<br>oc-179       | HMRCYN<br>RCHG          |
| <i>Manduca sexta</i>           | Bactericidin B-3                                  | WNPFKELERAGQVRDAIISAGPAVATVGQAAAIARG                                  | MSb<br>acB3-312     | QVRDA<br>IISA           |
| <i>Hyphtria cunea</i>          | Hyphancin IIIIE                                   | RWKFFKKIERVGGQNVRDGLIKAGPAIQVLGAAKAL                                  | HCh<br>ypE-166      | WKFFKK<br>IERVGQ<br>NVR |



|                                         |                  |                                              |                         |                         |
|-----------------------------------------|------------------|----------------------------------------------|-------------------------|-------------------------|
| <i>Pandin<br/>us<br/>imperat<br/>or</i> | Pandinin-1       | GKVWDWIKSAAKKIWSSEPVSQKGGQVLNAAKNYVAEKIGATPT | PIpa<br>n1-<br>365      | KVWDWI<br>KSAAKK<br>IWS |
| <i>Oxyope<br/>s<br/>kitaben<br/>sis</i> | Oxyopinin-<br>2d | GKFSVFSKILRSIAKVFKGVGKVRKGFKTASDLDKNQ        | OKo<br>xy2<br>b-<br>374 | AKVFKG<br>VGKVRK<br>GFK |
