# Supplementary material for: Immunomodulatory Peptides as Vaccine Adjuvants and Antimicrobial Agents
Source: MDPI journal article supplement (doi:10.3390/ph17020201), 2024-02-02
Supplement: s1 [file s1]

**Supplementary Material S3** MD simulation studies for the most potent antiviral, antitubercular, antifungal, and anticancer immunoadjuvant peptides

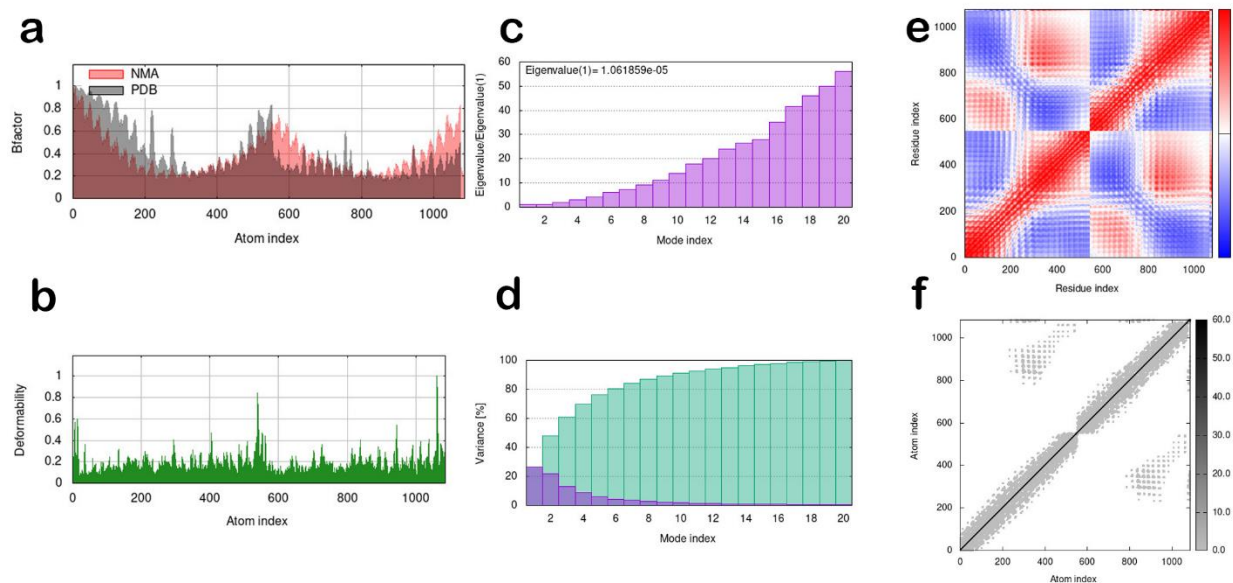

Molecular dynamics simulation of TLR1/TLR2-SPalf2-453 complex as the antiviral adjuvant. (a) B-factor, (b) Deformability, (c) Eigenvalues, (d) Variance, (e) Covariance matrix, (f) The elastic network map.

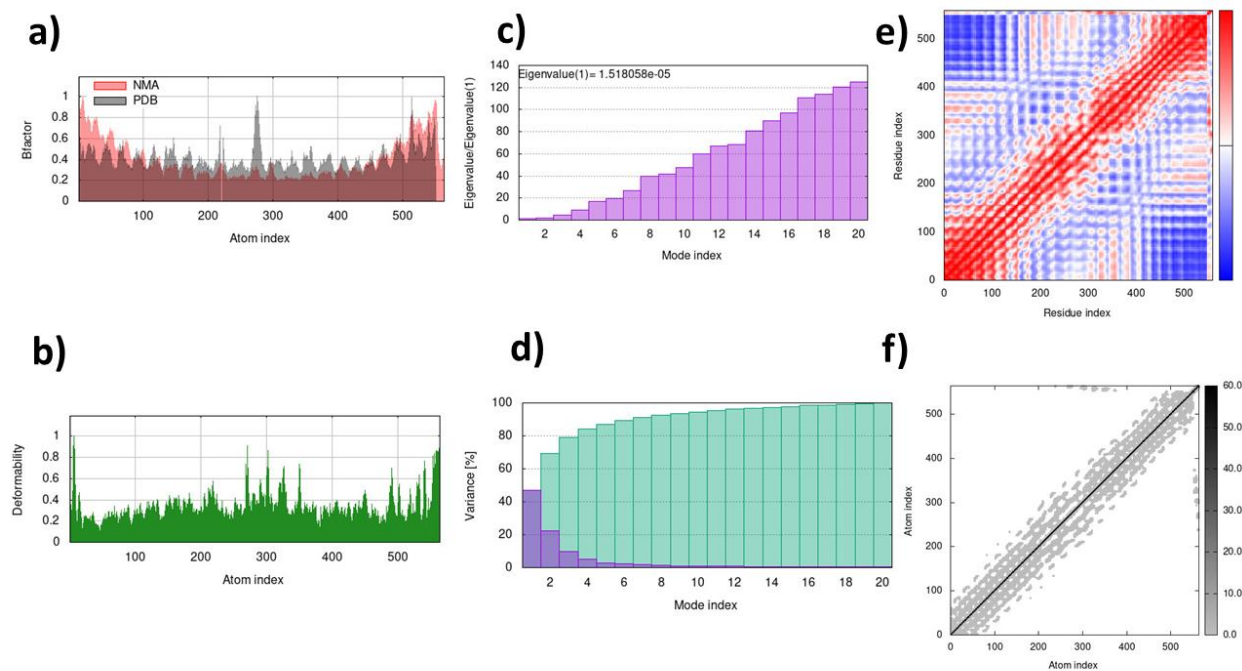

Molecular dynamics simulation of TLR2-PPpp113-266 complex as the antitubercular adjuvant. (a) B-factor, (b) Deformability, (c) Eigenvalues, (d) Variance, (e) Covariance matrix, (f) The elastic network map.

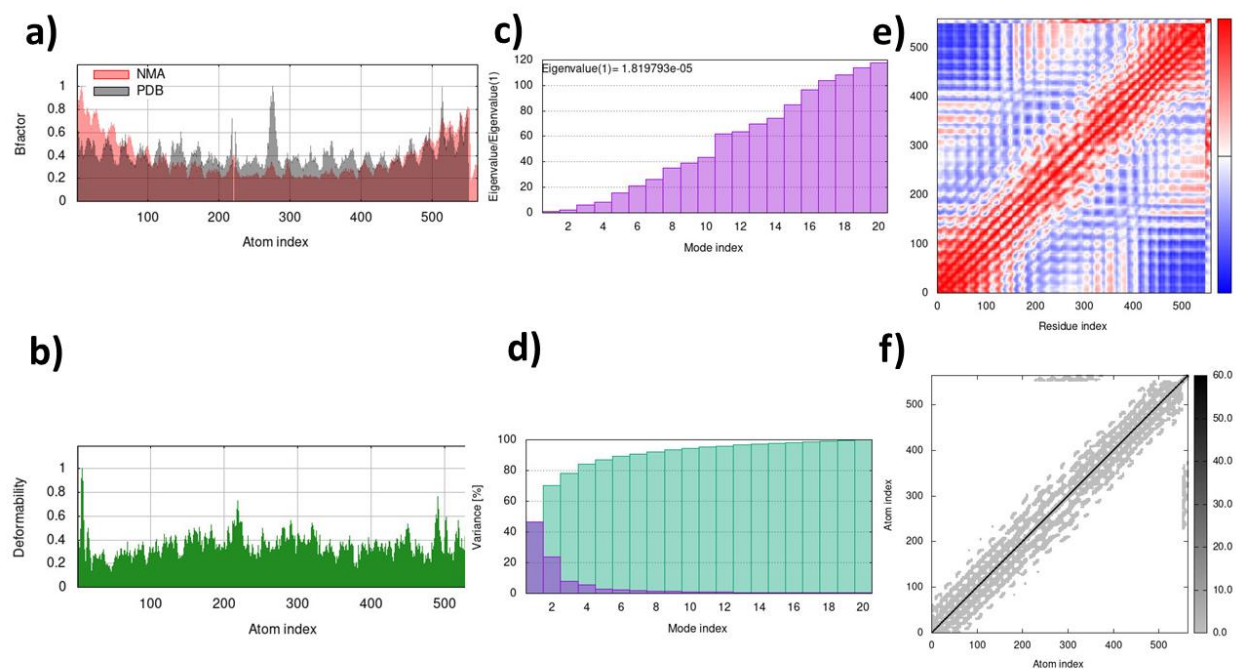

Molecular dynamics simulation of TLR2-LSsty1-174 complex as the antifungal adjuvant. (a) B-factor, (b) Deformability, (c) Eigenvalues, (d) Variance, (e) Covariance matrix, (f) The elastic network map.

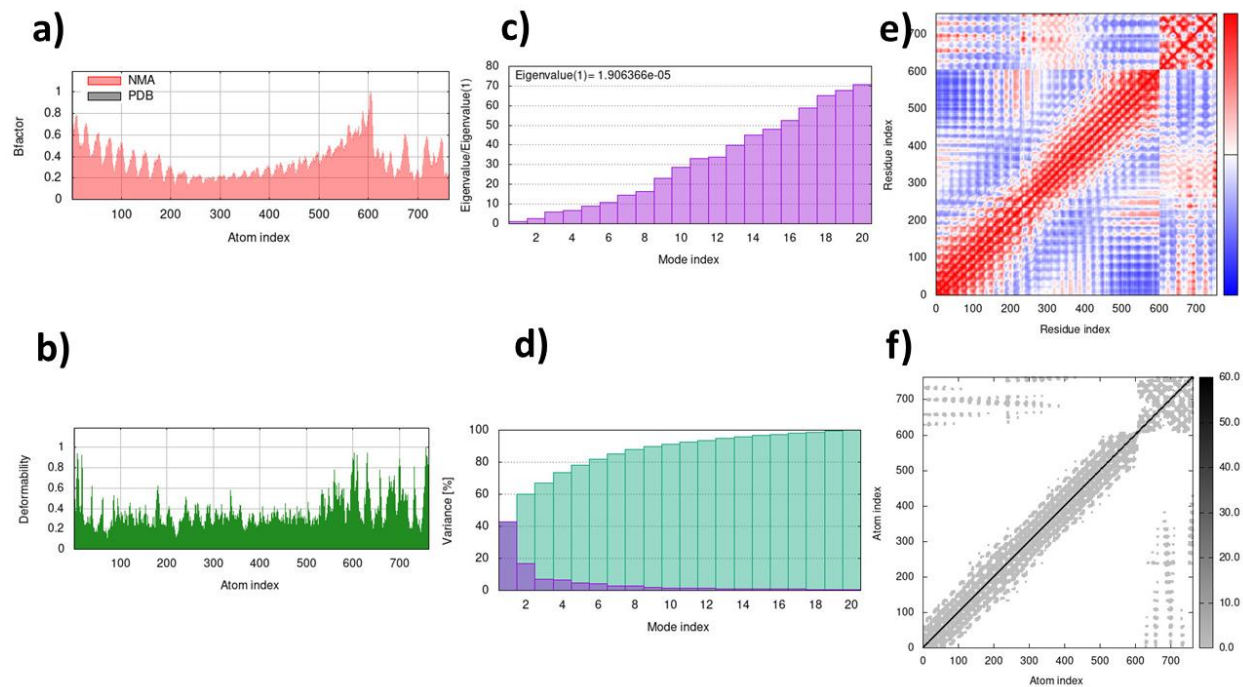

Molecular dynamics simulation of TLR4/MD2-SBsib-711 complex as the anticancer adjuvant. (a) B-factor, (b) Deformability, (c) Eigenvalues, (d) Variance, (e) Covariance matrix, (f) The elastic network map.
